# Supplementary material
Source: ML conference proceedings conference paper supplement (https://proceedings.neurips.cc/paper_files/paper/2018/hash/366f0bc7bd1d4bf414073cabbadfdfcd-Abstract.html)
Supplement: Supplementary file [file 366f0bc7bd1d4bf414073cabbadfdfcd-Supplemental.zip]

## A Proof of Lemma and Theorem

*Lemma 3.1 proof.* For the first equation can be proved by expanding the inner product according to the definition of the transformation. Note that  $\langle \tilde{h}, \phi(x_i, b_i) \rangle = \langle [h; 1; 0], [x_i; b_i; \sqrt{U^2 - \|x_i\|^2 - b_i^2}] \rangle = \langle h, x_i \rangle + 1 \cdot b_i + 0 \cdot \sqrt{U^2 - \|x_i\|^2 - b_i^2} = \langle h, x_i \rangle + b_i$ . The second equation follows from the relation between the inner product and the distance in Euclidean spaces:  $\rho(\tilde{h}, \phi(x_i, b_i))^2 = \|\tilde{h} - \phi(x_i, b_i)\|^2 = \|\tilde{h}\|^2 + \|\phi(x_i, b_i)\|^2 - 2\langle \tilde{h}, \phi(x_i, b_i) \rangle = \|h\|^2 + 1 + U^2 - 2\langle \tilde{h}, \phi(x_i, b_i) \rangle$ .  $\square$

*Theorem 3.2 proof.* By Lemma 3.1, the distance  $\rho(\tilde{h}, \phi(x_i, b_i))$  depends strictly monotonically decreasingly on  $\langle h, x_i \rangle + b_i$ . The claim of the theorem then follows straightforwardly upon this fact.  $\square$

## B Visualization of Similarity Relation

Our IPPT (Section 3.2.1) approach provides a convenient way to transform inner product against word embedding vectors to a metric space, exploiting closeness between words through their metric relation, and then inversely transforming metric distance back to inner product result in  $O(1)$  complexity, which then can be consumed by the final softmax function to compute word probabilities. To see the metric relation, we utilize t-SNE [57] to visualize the weights at the vocabulary projection layer by mapping it to a 2D Euclidean distance space. As shown in Figure 5, words in the projection layer clearly has conceptual and positional properties. Thus semantic more similar words are closer in distance.

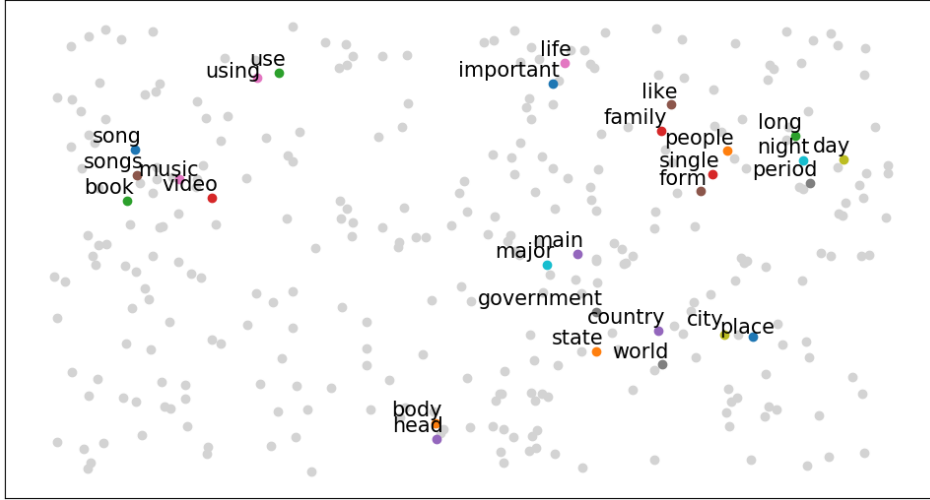

Figure 5: Projection of word embedding vectors on a 2D Euclidean distance space. 400 words are sampled from the vocabulary projection weights of WikiText-2 by filtering the high frequency words (higher than 1000) and low frequency words (less than 100). Training methodology to get the weights is included in Section 4.2.

## C A Bound on Top- $K$ Softmax Approximation

In this section we derive an error bound of top- $K$  highest ranked words approximation on softmax toward a probability distribution. Let  $V$  be the set of vocabulary. Let  $s_i$  ( $1 \leq i \leq |V|$ ) be the scores produced using exhaustive search, sorted in decreasing order. Suppose  $L$  is a lower bound for  $\{s_i\}$ , i.e.,  $L \leq \min s_i$ . Typically one chooses  $L$  to be a negative number with sufficiently large absolute value. If there is no known lower bound, one may also set  $L = -\infty$  and agrees that  $\exp(-\infty) = 0$ . The probability distribution generated by applying softmax on  $s_i$  is given by  $p_i = \exp(s_i) / \sum_i \exp(s_i)$ . Using exhaustive search we are able to compute  $p_i$  as exact. However

with approximated techniques, we are only able to obtain an approximation  $\hat{p}_i$  of the distribution. In real applications we typically only care about how  $\hat{p}_i$  differs from  $p_i$  for the top- $K$  words. The error in such approximations comes from two sources: (1) the accuracy of the approximation to obtain the approximated top- $K$ ; and (2) the approximation of  $\sum_i \exp(s_i)$ . In the following theorem we give a quantitative analysis of how large the relative error could be.

**Theorem C.1.** *Let  $V$ ,  $s_i$ ,  $L$ ,  $p_i$  be as above. Let  $\mathcal{K} \subseteq \{1, \dots, |V|\}$  be the ground truth top- $K$  indices. Suppose an approximation top- $K$  softmax algorithm gives  $\mathcal{K}' \subseteq \{1, \dots, |V|\}$  as the approximated top- $K$  indices. Let  $\hat{s}_i$  be the approximated score the algorithm assigns to the  $i$ -th word in  $V$ , and let  $s' = \min_{i \in \mathcal{K}'} \hat{s}_i$ . Assume that (i) the algorithm assigns exact scores  $\hat{s}_i = s_i$  to those  $i \in \mathcal{K}'$ ; and (ii) it assigns a score  $\hat{s}_i$  for  $i \notin \mathcal{K}'$  such that  $L \leq \hat{s}_i \leq s'$ . The approximated probability distribution is given by  $\hat{p}_i := \exp(\hat{s}_i) / \sum_i \exp(\hat{s}_i)$ . Let  $\mathcal{K}'' = \{i : s_i \geq s'\}$ . Then the relative error of probability distribution approximation is bounded by  $|\hat{p}_i - p_i|/p_i \leq \frac{\sum_{i \in \mathcal{K}'' \setminus \mathcal{K}'} (\exp(s_i) - \exp(L)) + (|V| - |\mathcal{K}''|)(\exp(s') - \exp(L))}{\sum_{i \in \mathcal{K}'} \exp(\hat{s}_i) + (|V| - K) \exp(L)}$  for any  $i \in \mathcal{K} \cap \mathcal{K}'$ .*

*Proof.* First note that  $p_i = \frac{\exp(s_i)}{\sum_i \exp(s_i)}$  and that  $\hat{p}_i = \frac{\exp(\hat{s}_i)}{\sum_i \exp(\hat{s}_i)}$ . Since  $i \in \mathcal{K} \cap \mathcal{K}'$ , we have  $s_i = \hat{s}_i$ . We then deduce that

$$\frac{|\hat{p}_i - p_i|}{p_i} = \frac{|\sum_i \exp(s_i) - \sum_i \exp(\hat{s}_i)|}{\sum_i \exp(\hat{s}_i)}. \quad (1)$$

We then proceed to bound both the numerator and the denominator.

To find an upper bound for the numerator, first note that

$$\left| \sum_i \exp(s_i) - \sum_i \exp(\hat{s}_i) \right| \leq \left| \sum_{i \in \mathcal{K}''} \exp(s_i) - \sum_{i \in \mathcal{K}''} \exp(\hat{s}_i) \right| + \left| \sum_{i \notin \mathcal{K}''} \exp(s_i) - \sum_{i \notin \mathcal{K}''} \exp(\hat{s}_i) \right|. \quad (2)$$

For the first summand, first observe that  $\mathcal{K} \subseteq \mathcal{K}''$  and  $\mathcal{K}' \subseteq \mathcal{K}''$ . Therefore

$$\left| \sum_{i \in \mathcal{K}''} \exp(s_i) - \sum_{i \in \mathcal{K}''} \exp(\hat{s}_i) \right| = \left| \sum_{i \in \mathcal{K}'} (\exp(s_i) - \exp(\hat{s}_i)) + \sum_{i \in \mathcal{K}'' \setminus \mathcal{K}'} (\exp(s_i) - \exp(\hat{s}_i)) \right|.$$

The condition (i) implies that the first sum is zero. The second sum is always non-negative since  $\exp(s_i) \geq \exp(s') \geq \exp(\hat{s}_i)$  for  $i \in \mathcal{K}'' \setminus \mathcal{K}'$ . Thus  $\left| \sum_{i \in \mathcal{K}'' \setminus \mathcal{K}'} (\exp(s_i) - \exp(\hat{s}_i)) \right| = \sum_{i \in \mathcal{K}'' \setminus \mathcal{K}'} (\exp(s_i) - \exp(\hat{s}_i)) \leq \sum_{i \in \mathcal{K}'' \setminus \mathcal{K}'} (\exp(s_i) - \exp(L))$ . For the second summand in the right hand side of Equation (2), note that  $\left| \sum_{i \notin \mathcal{K}''} \exp(s_i) - \sum_{i \notin \mathcal{K}''} \exp(\hat{s}_i) \right| \leq \sum_{i \notin \mathcal{K}''} |\exp(s_i) - \exp(\hat{s}_i)|$ . Since both  $s_i, \hat{s}_i \in [L, s']$  for all  $i \notin \mathcal{K}''$ , we have  $\sum_{i \notin \mathcal{K}''} |\exp(s_i) - \exp(\hat{s}_i)| \leq \sum_{i \notin \mathcal{K}''} (\exp(s') - \exp(L)) = (|V| - |\mathcal{K}''|)(\exp(s') - \exp(L))$ . This shows the upper bound of the numerator.

For the denominator in the right hand side of Equation (1), simply note that  $\sum_i \exp(\hat{s}_i) = \sum_{i \in \mathcal{K}'} \exp(\hat{s}_i) + \sum_{i \notin \mathcal{K}'} \exp(\hat{s}_i) \geq \sum_{i \in \mathcal{K}'} \exp(\hat{s}_i) + (|V| - K) \exp(L)$ . This then concludes the proof of the theorem.  $\square$

It is worthy to point out that the numerator of the above error bound can be rewritten as  $\sum_{i \in \mathcal{K}'' \setminus \mathcal{K}'} (\exp(s_i) - \exp(s')) + (|V| - K)(\exp(s') - \exp(L))$ . Intuitively, the theorem states that the accuracy of the softmax probability approximation for the top- $K$  words depends on three quantities: (i)  $\sum_{i \in \mathcal{K}'' \setminus \mathcal{K}'} (\exp(s_i) - \exp(s'))$ , which measures how many words are “missed” by the approximation of top- $K$  words, (ii)  $\exp(s') - \exp(L)$ , which measures the distribution of the scores found by the approximation. The smaller (i) and (ii) are (relative to  $\sum_{i \in \mathcal{K}'} \exp(\hat{s}_i)$ ), the better the approximation is.

We also observe that when the precision at  $K$  is 1 for the approximation algorithm, then the bound depends only on the sum of exponential scores and the smallest top- $K$  score retrieved by the algorithm.

**Corollary C.1.1.** *Let the notations be the same as in the above theorem. Assume that the precision at  $K$  of the approximation is 1. Further assume that all the scores  $s_i$  are distinct. Then the relative error to the approximated softmax probability distribution is bounded above by  $|\hat{p}_i - p_i|/p_i \leq \frac{(|V| - K)(\exp(s') - \exp(L))}{\sum_{i \in \mathcal{K}'} \exp(\hat{s}_i) + (|V| - K)\exp(L)}$  for any  $i \in \mathcal{K} \cap \mathcal{K}'$ .*

*Proof.* It suffices to show that  $\mathcal{K}'' = \mathcal{K}'$ . Since the precision at  $K$  is 1, we have  $\mathcal{K} = \mathcal{K}'$ , which means  $s' = \min_{i \in \mathcal{K}'} \hat{s}_i = \min_{i \in \mathcal{K}} s_i$ . Now assume  $i \in \mathcal{K}''$ , then by definition of  $\mathcal{K}''$ ,  $s_i \geq \min_{j \in \mathcal{K}} s_j$ . Since all scores are distinct, this shows that  $s_i$  is amongst the top- $K$ , i.e.,  $s_i \in \mathcal{K} = \mathcal{K}'$ . Thus  $\mathcal{K}'' \subseteq \mathcal{K}'$ . The other direction of inclusion is trivial.  $\square$

## D Additional Results

**Speedup with different vocabulary size.** Figure 6 shows the speedup for FGD (with different  $efSearch$ ) over the execution time of full-softmax for vocabulary size 10K, 20K, 40K, and 80K. When  $efSearch = 20$ , FGD achieves more than 65X speedup over the baseline with a vocabulary size 80K. Even with smaller vocabulary size, FGD still achieves roughly an order of magnitude speedup. Overall, FGD achieves speedup over the baseline consistently and scales well with different  $efSearch$  values.

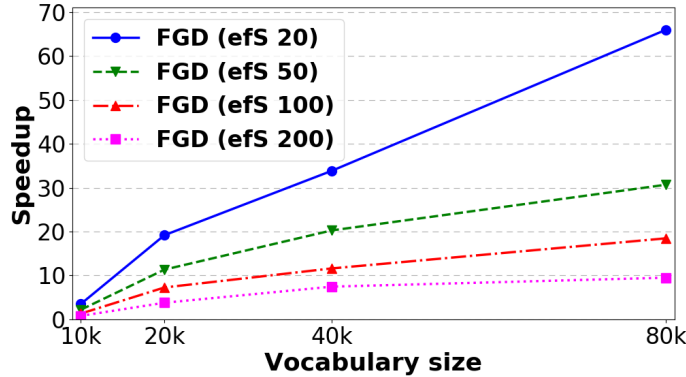

Figure 6: Performance of FGD, normalized to full-softmax execution time. Higher is better.

**Sensitivity of word embedding dimension.** Table 4 reports the precision with varying word vector embedding dimension 128, 256, and 512 on the WikiText-2 language modeling. The vocabulary size is set to the default 33,728. In most cases,  $efSearch$  being 50 or 100 is sufficient to provide high precision (e.g.,  $> 0.95$ ). Over 0.99 precision can be reached when  $efSearch$  is 200. This indicates that FGD offers high precision with different word embedding dimensions.

| D   | P@K  | FGD (efSearch) |       |       |       |
|-----|------|----------------|-------|-------|-------|
|     |      | 20             | 50    | 100   | 200   |
| 128 | P@1  | 0.913          | 0.993 | 0.998 | 0.999 |
|     | P@10 | 0.819          | 0.934 | 0.976 | 0.992 |
| 256 | P@1  | 0.832          | 0.917 | 0.958 | 0.992 |
|     | P@10 | 0.866          | 0.944 | 0.976 | 0.995 |
| 512 | P@1  | 0.854          | 0.921 | 0.968 | 0.988 |
|     | P@10 | 0.884          | 0.950 | 0.979 | 0.995 |

Table 4: Precision of FGD on WikiText-2 dataset varying word vector embedding dimension.

Figure 7 compares with the execution time of FGD and full-softmax, FGD achieves an order of magnitude reduction of execution time.

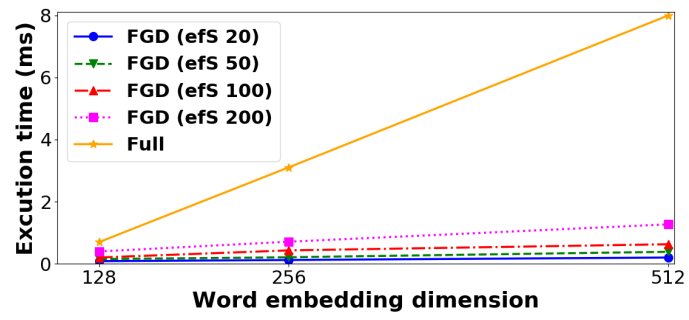

Figure 7: Scalability of WikiText-2 language model varying word vector embedding dimension.
